# Supplementary material for: Optimization of sensors based on encapsulated algae for pesticide detection in water
Source: Royal Society of Chemistry journal article supplement (doi:10.1039/c9ay02145k), 2019-01-01
Supplement: c9ay02145k1.pdf [file c9ay02145k1.pdf]

### Supplementary data

Table S1: Silica hydrogel compositions

| Silica hydrogel formulation<br>(Final percentage of silica in hydrogel –<br>Ratio Sodium silicate:Ludox in final gel) | Sodium Silicate<br>(diluted 10 times)<br>in $\mu\text{L}$ | Ludox (pure)<br>in $\mu\text{L}$ | HCl (1.15 M)<br>in $\mu\text{L}$ | Phosphate Buffer<br>(0.5 M, pH 8)<br>in $\mu\text{L}$ | H <sub>2</sub> O<br>in $\mu\text{L}$ |
|-----------------------------------------------------------------------------------------------------------------------|-----------------------------------------------------------|----------------------------------|----------------------------------|-------------------------------------------------------|--------------------------------------|
| 3 % - 1:10                                                                                                            | 173                                                       | 101                              | 45                               | 300                                                   | 881                                  |
| 3 % - 1:20                                                                                                            | 87                                                        | 107                              | 23                               | 300                                                   | 984                                  |
| 4 % - 1:10                                                                                                            | 231                                                       | 135                              | 60                               | 300                                                   | 774                                  |
| 4 % - 1:20                                                                                                            | 115                                                       | 143                              | 30                               | 300                                                   | 912                                  |
| 5 % - 1:10                                                                                                            | 288                                                       | 169                              | 75                               | 300                                                   | 668                                  |
| 5 % - 1:20                                                                                                            | 144                                                       | 178                              | 38                               | 300                                                   | 840                                  |
| 6 % - 1:10                                                                                                            | 346                                                       | 203                              | 90                               | 300                                                   | 561                                  |
| 6 % - 1:20                                                                                                            | 173                                                       | 214                              | 45                               | 300                                                   | 768                                  |
| 7 % - 1:10                                                                                                            | 404                                                       | 236                              | 105                              | 300                                                   | 455                                  |
| 7 % - 1:20                                                                                                            | 202                                                       | 249                              | 53                               | 300                                                   | 696                                  |
| 8 % - 1:10                                                                                                            | 462                                                       | 270                              | 120                              | 300                                                   | 348                                  |
| 8 % - 1:20                                                                                                            | 231                                                       | 285                              | 60                               | 300                                                   | 624                                  |
| 9 % - 1:10                                                                                                            | 519                                                       | 304                              | 135                              | 300                                                   | 242                                  |
| 9 % - 1:20                                                                                                            | 260                                                       | 321                              | 68                               | 300                                                   | 552                                  |
| 10 % - 1:10                                                                                                           | 577                                                       | 338                              | 150                              | 300                                                   | 136                                  |
| 10 % - 1:20                                                                                                           | 288                                                       | 356                              | 75                               | 300                                                   | 480                                  |
